# Supplementary material
Source: PubMed Central journal article supplement (PMC3674866)
Supplement: NIHMS475391-supplement-Supplementary_Data.pdf [file NIHMS475391-supplement-Supplementary_Data.pdf]

**Supplementary Information:**

**ChIP-mass spectrometry captures protein interactions and modified histones associated with dosage compensation in *Drosophila***

C.I. Wang<sup>1,2</sup>, A.A. Alekseyenko<sup>1,2</sup>, G. LeRoy<sup>3</sup>, A.E.H. Elia<sup>1,2,4,5</sup>, A.A. Gorchakov<sup>1,2,6</sup>, L-M.P. Britton<sup>3</sup>, S.J. Elledge<sup>1,2,5</sup>, P.V. Kharchenko<sup>7</sup>, B.A. Garcia<sup>3</sup>, M.I. Kuroda<sup>1,2</sup>

1. Division of Genetics, Department of Medicine, Brigham and Women's Hospital, Boston, Massachusetts 02115, USA;
2. Department of Genetics, Harvard Medical School, Boston, Massachusetts 02115, USA;
3. Department of Molecular Biology, Princeton University, Princeton, New Jersey 08544, USA;
4. Department of Radiation Oncology, Massachusetts General Hospital, Boston, MA 02114, USA;
5. Howard Hughes Medical Institute;
6. Institute of Molecular and Cell Biology, Novosibirsk, Russia;
7. Center for Biomedical Informatics, Harvard Medical School, Boston, Massachusetts 02115, USA.

| Gene        | Unique | Total |
|-------------|--------|-------|
| CG11198     | 71     | 144   |
| CG1516      | 37     | 79    |
| Hsc70-5     | 9      | 21    |
| Aldh        | 6      | 9     |
| ATPsyn      | 5      | 7     |
| Hsp60       | 5      | 6     |
| Hsc70-4     | 5      | 5     |
| Ef1alpha48D | 4      | 7     |
| Nc73EF      | 4      | 4     |
| EFTuM       | 4      | 4     |
| blw         | 4      | 4     |
| wal         | 3      | 6     |
| sesB        | 3      | 3     |
| Sucb        | 3      | 3     |
| SmB         | 2      | 4     |
| betaTub56D  | 2      | 3     |
| Act5C       | 2      | 2     |
| CG11963     | 2      | 2     |
| His4        | 2      | 2     |
| CG3902      | 2      | 2     |
| I(1)G0156   | 2      | 2     |
| mod         | 2      | 2     |
| Sod2        | 1      | 3     |
| snRNP69D    | 1      | 2     |
| Hsc70-1     | 1      | 2     |
| Hsp83       | 1      | 2     |
| Scs         | 1      | 2     |
| CG17896     | 1      | 2     |
| scu         | 1      | 2     |
| His2B       | 1      | 2     |
| CG4389      | 1      | 2     |
| CG7362      | 1      | 2     |
| Nop60B      | 1      | 1     |
| CG1673      | 1      | 1     |
| His2A       | 1      | 1     |
| CG7834      | 1      | 1     |
| CG11876     | 1      | 1     |
| Gapdh1      | 1      | 1     |
| nop5        | 1      | 1     |
| eIF-4a      | 1      | 1     |
| Rm62        | 1      | 1     |
| Acon        | 1      | 1     |
| ERp60       | 1      | 1     |
| mRpL12      | 1      | 1     |
| mtacp1      | 1      | 1     |
| I(2)37Cc    | 1      | 1     |
| CG15093     | 1      | 1     |
| Hel25E      | 1      | 1     |
| bor         | 1      | 1     |
| Hsp23       | 1      | 1     |
| Roe1        | 1      | 1     |
| CG7145      | 1      | 1     |
| Fib         | 1      | 1     |

|          |   |   |
|----------|---|---|
| sni      | 1 | 1 |
| Ef2b     | 1 | 1 |
| Cyp1     | 1 | 1 |
| CG1640   | 1 | 1 |
| RpL31    | 1 | 1 |
| CG1416   | 1 | 1 |
| CG16935  | 1 | 1 |
| CG12558  | 1 | 1 |
| SRm160   | 1 | 1 |
| Scsalpha | 1 | 1 |

**Supplementary Table 1.**

List of proteins recovered with streptavidin-biotin purification of non-HTB tagged cells from one representative experiment. Unique: unique peptides; Total: total peptides.

| PTM               | P      | Input  | P/IN |
|-------------------|--------|--------|------|
| <b>Histone H3</b> |        |        |      |
| H3K4un            | 75.28% | 83.02% | 0.91 |
| H3K4me1           | 24.63% | 13.69% | 1.80 |
| H3K4me2           | 0.05%  | 2.18%  | 0.02 |
| H3K4me3           | 0.04%  | 1.11%  | 0.03 |
| H3K9un            | 45.44% | 46.08% | 0.99 |
| H3K9me1           | 15.62% | 19.05% | 0.82 |
| H3K9me2           | 28.22% | 26.53% | 1.06 |
| H3K9me3           | 8.23%  | 6.71%  | 1.23 |
| H3K9ac            | 2.50%  | 1.62%  | 1.54 |
| H3K14un           | 80.54% | 80.63% | 1.00 |
| H3K14ac           | 19.46% | 19.37% | 1.00 |
| H3K18un           | 95.53% | 94.77% | 1.01 |
| H3K18me1          | 0.03%  | 0.47%  | 0.07 |
| H3K18ac           | 4.44%  | 4.76%  | 0.93 |
| H3K23un           | 53.57% | 57.43% | 0.93 |
| H3K23me1          | 0.61%  | 0.90%  | 0.68 |
| H3K23ac           | 45.82% | 41.67% | 1.10 |
| H3K27un           | 16.18% | 16.56% | 0.98 |
| H3K27me1          | 10.53% | 18.38% | 0.57 |
| H3K27me2          | 52.76% | 39.16% | 1.35 |
| H3K27me3          | 20.13% | 25.21% | 0.80 |
| H3K27ac           | 0.40%  | 0.69%  | 0.58 |
| H3K36un           | 58.17% | 77.38% | 0.75 |
| H3K36me1          | 28.05% | 16.06% | 1.75 |
| H3K36me2          | 9.92%  | 4.95%  | 2.01 |
| H3K36me3          | 3.85%  | 1.61%  | 2.39 |
| H3K79un           | 50.27% | 66.08% | 0.76 |
| H3K79me1          | 36.52% | 27.21% | 1.34 |
| H3K79me2          | 13.21% | 6.70%  | 1.97 |
| <b>Histone H4</b> |        |        |      |
| H4K5un            | 96.15% | 94.13% | 1.02 |
| H4K5ac            | 3.85%  | 5.87%  | 0.65 |
| H4K8un            | 89.14% | 87.69% | 1.02 |
| H4K8ac            | 10.86% | 12.31% | 0.88 |
| H4K12un           | 92.34% | 94.78% | 0.97 |
| H4K12ac           | 7.66%  | 5.22%  | 1.47 |
| H4K16un           | 68.72% | 91.86% | 0.75 |
| H4K16ac           | 31.28% | 8.14%  | 3.84 |
| H4K20un           | 8.94%  | 14.40% | 0.62 |
| H4K20me1          | 11.87% | 23.32% | 0.51 |
| H4K20me2          | 79.20% | 62.28% | 1.27 |

**Supplementary Table 2.**

Histone PTM mass spectrometry results from single-step IgG purification of MSL-TAP chromatin. Approximate percent abundance at each modified residue is shown for input (IN) and MSL3-TAP pulldown (P) experiments.

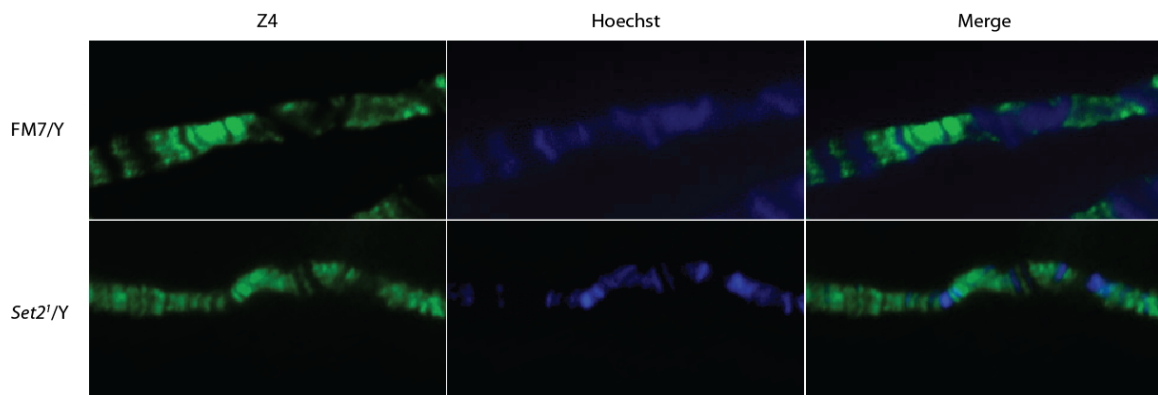

**Supplementary Figure 1. *Set2*<sup>1</sup> mutant shows wild-type interband staining pattern when immunostained with anti Z4 antibody.**

Immunostaining of larval salivary gland polytene chromosomes of *Set2*<sup>1</sup> mutant with an antibody to active chromatin protein Z4 (green) showed similar robust interband localization when compared to wild-type animals. Hoechst staining of DNA is shown in blue.
